# Supplementary material
Source: bioRxiv or medRxiv preprint supplement (http://medrxiv.stage.highwire.org/highwire/filestream/91892/field_highwire_adjunct_files/0/2020.07.31.20165654-1.pdf)
Supplement: Supplementary file [file 2020.07.31.20165654-1.pdf]

**Supplemental Table 1.** Restrictions on mass gatherings put in place at the state level in the United States.

| US State             | First Case <sup>1</sup>  | Cases at Start <sup>2</sup> | Start Date (2020) <sup>3</sup> | End Date (2020) <sup>3</sup>            | Re-expanded <sup>4</sup> | Duration (Days) <sup>5</sup> |
|----------------------|--------------------------|-----------------------------|--------------------------------|-----------------------------------------|--------------------------|------------------------------|
| Alabama              | March 13 <sup>th</sup>   | 51                          | March 19 <sup>th</sup>         | May 11 <sup>th</sup>                    | -                        | 53                           |
| Alaska               | March 12 <sup>th</sup>   | 22                          | March 23 <sup>rd</sup>         | May 22 <sup>nd</sup>                    | -                        | 60                           |
| Arizona              | January 26 <sup>th</sup> | 1,169                       | March 31 <sup>st</sup>         | May 16 <sup>th</sup>                    | June 29 <sup>th</sup>    | 46                           |
| Arkansas             | March 11 <sup>th</sup>   | 350                         | March 27 <sup>th</sup>         | June 18 <sup>th</sup>                   | -                        | 83                           |
| California           | January 25 <sup>th</sup> | 179                         | March 11 <sup>th</sup>         | <i>July 1<sup>st</sup></i> <sup>6</sup> | -                        | 112                          |
| Colorado             | March 5 <sup>th</sup>    | 216                         | March 19 <sup>th</sup>         | July 30 <sup>th</sup>                   | -                        | 133                          |
| Connecticut          | March 8 <sup>th</sup>    | 3                           | March 12 <sup>th</sup>         | June 21 <sup>st</sup>                   | -                        | 101                          |
| Delaware             | March 11 <sup>th</sup>   | 7                           | March 16 <sup>th</sup>         | July 1 <sup>st</sup>                    | -                        | 107                          |
| District of Columbia | March 7 <sup>th</sup>    | 17                          | March 16 <sup>th</sup>         | May 16 <sup>th</sup>                    | -                        | 61                           |
| Florida              | March 1 <sup>st</sup>    | 9,000                       | April 3 <sup>rd</sup>          | June 5 <sup>th</sup>                    | -                        | 63                           |
| Georgia              | March 2 <sup>nd</sup>    | 800                         | March 24 <sup>th</sup>         | July 16 <sup>th</sup>                   | -                        | 114                          |
| Hawaii               | March 6 <sup>th</sup>    | 10                          | March 17 <sup>th</sup>         | <i>July 1<sup>st</sup></i>              | -                        | 106                          |
| Idaho                | March 11 <sup>th</sup>   | 73                          | March 25 <sup>th</sup>         | June 11 <sup>th</sup>                   | -                        | 78                           |
| Illinois             | January 24 <sup>th</sup> | 32                          | March 13 <sup>th</sup>         | <i>July 1<sup>st</sup></i>              | -                        | 110                          |
| Indiana              | March 6 <sup>th</sup>    | 11                          | March 12 <sup>th</sup>         | July 18 <sup>th</sup>                   | -                        | 128                          |
| Iowa                 | March 8 <sup>th</sup>    | 22                          | March 17 <sup>th</sup>         | June 12 <sup>th</sup>                   | -                        | 87                           |
| Kansas               | March 7 <sup>th</sup>    | 11                          | March 17 <sup>th</sup>         | June 8 <sup>th</sup>                    | -                        | 83                           |
| Kentucky             | March 6 <sup>th</sup>    | 35                          | March 19 <sup>th</sup>         | <i>July 1<sup>st</sup></i>              | -                        | 104                          |
| Louisiana            | March 9 <sup>th</sup>    | 14                          | March 13 <sup>th</sup>         | May 15 <sup>th</sup>                    | June 29 <sup>th</sup>    | 63                           |
| Maine                | March 12 <sup>th</sup>   | 32                          | March 18 <sup>th</sup>         | <i>July 1<sup>st</sup></i>              | -                        | 105                          |
| Maryland             | March 5 <sup>th</sup>    | 32                          | March 16 <sup>th</sup>         | June 10 <sup>th</sup>                   | -                        | 86                           |

| US State                  | First Case <sup>1</sup>   | Cases at Start <sup>2</sup> | Start Date (2020) <sup>3</sup> | End Date (2020) <sup>3</sup> | Re-expanded <sup>4</sup> | Duration (Days) <sup>5</sup> |
|---------------------------|---------------------------|-----------------------------|--------------------------------|------------------------------|--------------------------|------------------------------|
| Massachusetts             | February 1 <sup>st</sup>  | 108                         | March 13 <sup>th</sup>         | <i>July 1<sup>st</sup></i>   | -                        | 110                          |
| Michigan                  | March 10 <sup>th</sup>    | 12                          | March 13 <sup>th</sup>         | June 25 <sup>th</sup>        | -                        | 104                          |
| Minnesota                 | March 6 <sup>th</sup>     | 398                         | March 28 <sup>th</sup>         | <i>July 1<sup>st</sup></i>   | -                        | 95                           |
| Mississippi               | March 11 <sup>th</sup>    | 249                         | March 24 <sup>th</sup>         | July 20 <sup>th</sup>        | -                        | 118                          |
| Missouri                  | March 7 <sup>th</sup>     | 130                         | March 23 <sup>rd</sup>         | May 4 <sup>th</sup>          | -                        | 42                           |
| Montana                   | March 13 <sup>th</sup>    | 45                          | March 24 <sup>th</sup>         | June 1 <sup>st</sup>         | -                        | 69                           |
| Nebraska                  | February 17 <sup>th</sup> | 273                         | April 3 <sup>rd</sup>          | August 1 <sup>st</sup>       | -                        | 120                          |
| Nevada                    | March 5 <sup>th</sup>     | 265                         | March 24 <sup>th</sup>         | August 1 <sup>st</sup>       | -                        | 130                          |
| New Hampshire             | March 2 <sup>nd</sup>     | 13                          | March 16 <sup>th</sup>         | August 1 <sup>st</sup>       | -                        | 138                          |
| New Jersey                | March 4 <sup>th</sup>     | 98                          | March 16 <sup>th</sup>         | <i>July 1<sup>st</sup></i>   | -                        | 107                          |
| New Mexico                | March 11 <sup>th</sup>    | 4                           | March 12 <sup>th</sup>         | May 15 <sup>th</sup>         | -                        | 64                           |
| New York                  | March 1 <sup>st</sup>     | 217                         | March 12 <sup>th</sup>         | July 16 <sup>th</sup>        | -                        | 126                          |
| North Carolina            | March 4 <sup>th</sup>     | 18                          | March 14 <sup>th</sup>         | July 17 <sup>th</sup>        | -                        | 125                          |
| North Dakota <sup>7</sup> | March 11 <sup>th</sup>    | -                           | -                              | -                            | -                        | -                            |
| Ohio                      | March 9 <sup>th</sup>     | 4                           | March 12 <sup>th</sup>         | July 2 <sup>nd</sup>         | -                        | 112                          |
| Oregon                    | February 28 <sup>th</sup> | 20                          | March 12 <sup>th</sup>         | <i>July 1<sup>st</sup></i>   | -                        | 111                          |
| Pennsylvania              | March 6 <sup>th</sup>     | 3,441                       | March 30 <sup>th</sup>         | June 4 <sup>th</sup>         | -                        | 67                           |
| Rhode Island              | March 1 <sup>st</sup>     | 21                          | March 17 <sup>th</sup>         | July 30 <sup>th</sup>        | -                        | 135                          |
| South Carolina            | March 6 <sup>th</sup>     | 47                          | March 18 <sup>th</sup>         | July 10 <sup>th</sup>        | -                        | 114                          |
| South Dakota              | March 10 <sup>th</sup>    | 240                         | April 6 <sup>th</sup>          | April 28 <sup>th</sup>       | -                        | 22                           |
| Tennessee                 | March 5 <sup>th</sup>     | 424                         | March 23 <sup>rd</sup>         | August 30 <sup>th</sup>      | -                        | 160                          |
| Texas                     | February 12 <sup>th</sup> | 386                         | March 21 <sup>st</sup>         | June 3 <sup>rd</sup>         | June 26 <sup>th</sup>    | 74                           |

| US State      | First Case <sup>1</sup>   | Cases at Start <sup>2</sup> | Start Date (2020) <sup>3</sup> | End Date (2020) <sup>3</sup> | Re-expanded <sup>4</sup> | Duration (Days) <sup>5</sup> |
|---------------|---------------------------|-----------------------------|--------------------------------|------------------------------|--------------------------|------------------------------|
| Utah          | February 25 <sup>th</sup> | 40                          | March 17 <sup>th</sup>         | May 1 <sup>st</sup>          | -                        | 45                           |
| Vermont       | March 7 <sup>th</sup>     | 2                           | March 13 <sup>th</sup>         | <i>July 1<sup>st</sup></i>   | -                        | 110                          |
| Virginia      | March 7 <sup>th</sup>     | 42                          | March 15 <sup>th</sup>         | <i>July 1<sup>st</sup></i>   | -                        | 108                          |
| Washington    | January 21 <sup>st</sup>  | 419                         | March 13 <sup>th</sup>         | <i>July 1<sup>st</sup></i>   | -                        | 110                          |
| West Virginia | March 17 <sup>th</sup>    | 16                          | March 24 <sup>th</sup>         | <i>July 1<sup>st</sup></i>   | -                        | 99                           |
| Wisconsin     | February 5 <sup>th</sup>  | 47                          | March 17 <sup>th</sup>         | <i>July 1<sup>st</sup></i>   | -                        | 106                          |
| Wyoming       | March 11 <sup>st</sup>    | 18                          | March 20 <sup>th</sup>         | July 16 <sup>th</sup>        | -                        | 118                          |

<sup>1</sup> The date the first case was present in the respective states.

<sup>2</sup> The cumulative number of cases in the respective state at the time the intervention was implemented.

<sup>3</sup> Start and end dates of intervention implementation (NYC, 2020).

<sup>4</sup> Re-expansion indicates states that reverted back to stricter guidelines on mass gatherings after restrictions had been loosened.

<sup>5</sup> The number of days the intervention was implemented from start to end dates.

<sup>6</sup> Italicized July 1<sup>st</sup> dates represent an arbitrary end date chosen as a data cutoff point for this study.

<sup>7</sup> North Dakota did not implement a ban on mass gatherings.

## References

NYC (2020). *COVID-19: Data* [Online]. New York City Health. Available: <https://www1.nyc.gov/site/doh/covid/covid-19-data-archive.page> [Accessed July 20, 2020].
